# Supplementary material for: Whole genome and exome sequencing of monozygotic twins discordant for Crohn’s disease
Source: PubMed Central journal article supplement (PMC4102722; doi:10.1186/1471-2164-15-564), 2014-07-05
Supplement: 12864_2014_6260_MOESM1_ESM.pdf [file 12864_2014_6260_MOESM1_ESM.pdf]

**Supplementary Information for**

**Whole genome and exome sequencing of monozygotic twins**

**discordant for Crohn's disease**

**Britt-Sabina Petersen<sup>1§</sup>, Martina E. Spehlmann<sup>2</sup>, Andreas Raedler<sup>3</sup>, Björn Stade<sup>1</sup>, Ingo Thomsen<sup>1</sup>, Raquel Rabionet<sup>4</sup>, Philip Rosenstiel<sup>1</sup>, Stefan Schreiber<sup>2</sup>, Andre Franke<sup>1</sup>**

<sup>1</sup>Institute of Clinical Molecular Biology, Christian-Albrechts-University of Kiel, Germany

<sup>2</sup>Department of Internal Medicine, University Hospital Schleswig Holstein, Kiel, Germany

<sup>3</sup>Department of Internal Medicine II, Gastroenterology, Asklepios Westklinikum Hamburg, Hamburg, Germany

<sup>4</sup>Genomics and Disease Group, Center for Genomic Regulation, Barcelona, Spain

§Correspondence should be addressed to:

Britt-Sabina Petersen

Institute of Clinical Molecular Biology

Christian-Albrechts-University of Kiel

Schittenhelmstraße 12

24105 Kiel, Germany

phone: +49 431 597-1415

fax: +49 431 597-5788

email: [b.petersen@ikmb.uni-kiel.de](mailto:b.petersen@ikmb.uni-kiel.de)

**A. Clinical history of three monozygotic discordant twin pairs**

**B. Supplementary Figures**

**C. Supplementary Tables**

## **A. Clinical history of three monozygotic discordant twin pairs**

In all cases, the twins were female and co-twins grew up together with high sanitary comfort during childhood. All affected twins presented with ileocaecal disease, confirmed by both endoscopy and histopathology.

The first twin pair (TP1) was 63 years old at time of first recruitment. At the time, the diseased twin had been suffering from Crohn's disease for 17 years without fistula or stenosis, but with extraintestinal manifestations in form of arthritis. Surgery was not necessary and hospital stays were limited to a total of 1-3 months during time of disease. Total time of steroid intake was more than a year and flares occurred approximately once per year. Medications taken since disease onset include steroids, mesalazine, budesonide and infliximab the latter being the one she is currently treated with. Apart from an allergy against pollen she had no other known diseases additional to the intestinal disease. The healthy twin did not suffer from any diseases but had infectious urethritis in 2006.

The second twin pair (TP2) was 45 years old at time of recruitment. The affected twin had been suffering from Crohn's disease for 25 years and presented with anal fistula to the skin. Arthritis was diagnosed as an extraintestinal manifestation in the patient. The patient had to undergo emergency gut surgery due to ileal perforation in the ninth year of disease. Hospitalization was necessary approximately once per year since disease onset and she spent more than 6 months overall in the hospital. Steroids were administered for up to one year during the course of the disease but flares have not occurred regularly anymore since surgery. Medications taken so far include steroids and mesalazine. At time of sample collection however, no medications were administered. She was a smoker at time of diagnosis but not at time of sample collection and her healthy co-twin also smoked. No diseases apart from

Crohn`s disease exist. The healthy co-twin did not suffer from any known diseases and showed no signs of intestinal disease.

The third twin pair (TP3) was 32 years old at the time of first participation in the study. The diseased twin had been diagnosed with Crohn`s disease 20 years before. The patient presented with fistula (both anal and inguinal) and had been admitted to the hospital less than every 2 years for a total of 1-3 months since the onset of disease. Frequency of flares was 1 to 3 per year. She was a smoker at the time of sample collection but not before disease onset. The affected twin did not suffer from any diseases apart from an allergy to pollen and the described IBD. At the time of sample collection, the patient was medicated with mesalazine only. She had taken steroids for a total of one year in the past. The healthy co-twin never smoked and did not suffer from any diseases apart from hypothyroidism caused by lack of iodine.

## B. Supplementary Figures

**Supplementary Figure S1 - Venn diagrams for the concordance of all called SNVs in genomes and exomes of the three twin pairs.**

### TP1 genomes

SNV concordance  
all (known and novel) concordant SNPs

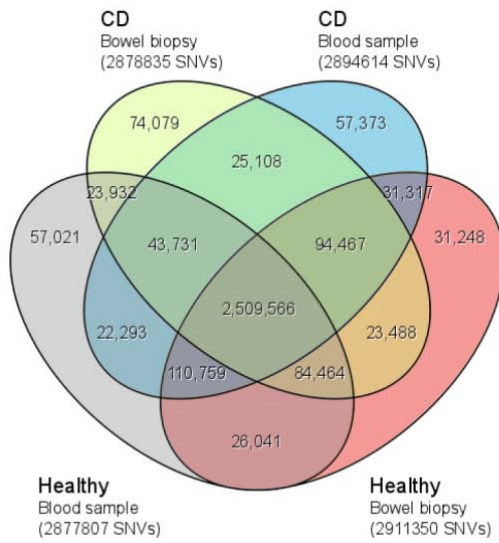

### TP1 exomes

SNV concordance  
all (known and novel) concordant SNPs

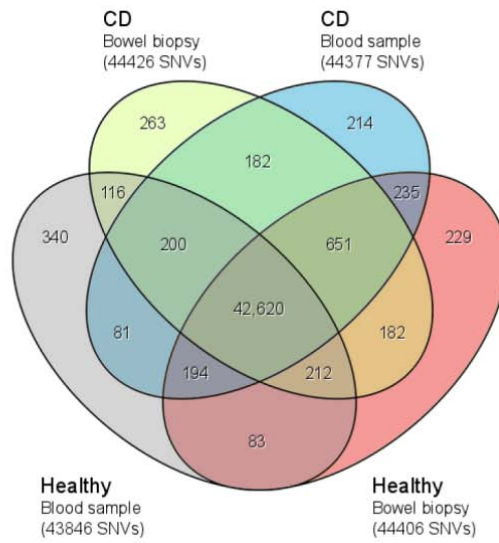

### TP2 exomes

SNV concordance  
all (known and novel) concordant SNPs

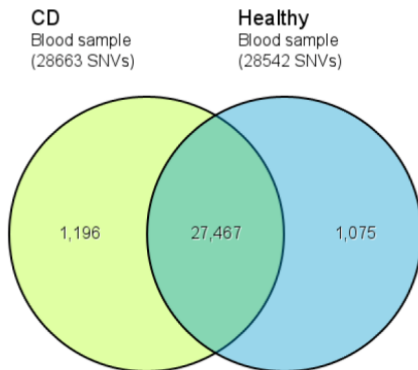

### TP3 exomes

SNV concordance  
all (known and novel) concordant SNPs

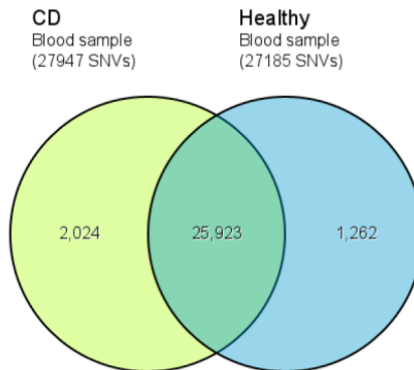

**Supplementary Figure S2 - Venn diagrams illustrating the overlap between the top 100 of the somatic mutation callers used to detect differences. a:** Overlap for the three comparisons performed for the four genomes of TP1 using pibase and SomaticSniper. **b:** Overlap for the three comparisons performed for the four exomes of TP1 using pibase, SomaticSniper and VarScan. **c:** Overlap for the comparisons performed for the blood samples of TP2 and TP3 using pibase, SomaticSniper and VarScan. Here, pibase called only 18 and 19 significant differences, respectively.

**TP1 genomes**

Top 100 of CD biopsy vs. CD blood

**TP1 genomes**

Top 100 of CD biopsy vs. healthy biopsy

**TP1 genomes**

Top 100 of CD biopsy vs. CD blood

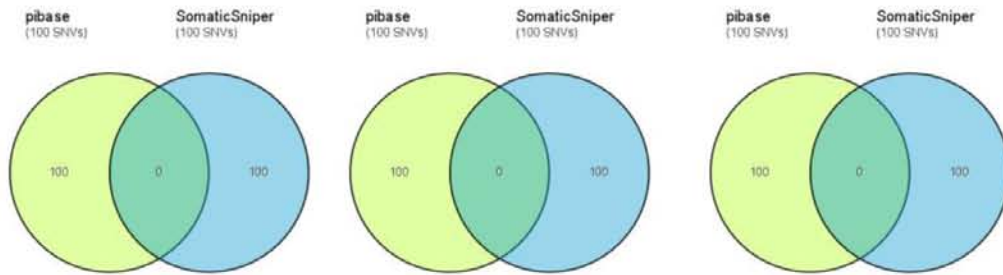

**a**

**TP1 exomes**

Top 100 of CD blood vs. healthy blood

**TP1 exomes**

Top 100 of CD biopsy vs. healthy biopsy

**TP1 exomes**

Top 100 of CD biopsy vs. CD blood

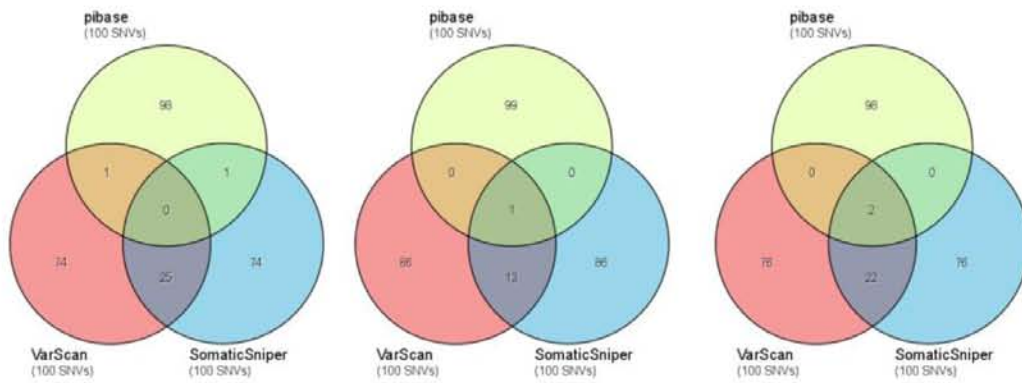

**b**

**TP2 exomes**

Top 100 of CD blood vs. healthy blood

**TP3 exomes**

Top 100 of CD blood vs. healthy blood

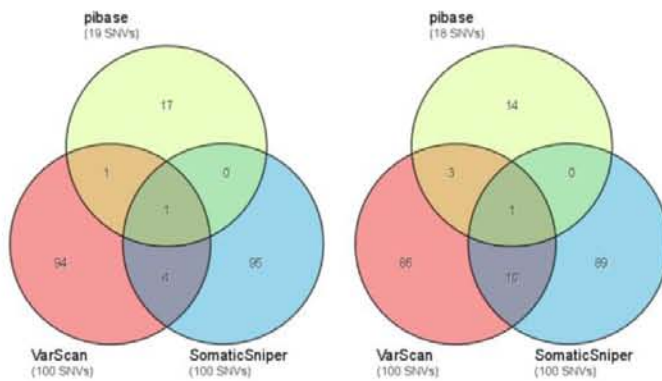

**c**

## **C. Supplementary Tables**

**Supplementary Table S1: Libraries, sequencing and mapping details of the four genomes of TP1.**



| Sample type,<br>individual | Library no.  | Library type &<br>sequencing length (bp) | First read in pair |                     | Second read in pair   |                     | All reads             |               |
|----------------------------|--------------|------------------------------------------|--------------------|---------------------|-----------------------|---------------------|-----------------------|---------------|
|                            |              |                                          | No. of reads       | Mapped reads (%)    | No. of reads          | Mapped reads (%)    | No. of reads          | Mapped reads  |
| <b>Blood, CD</b>           | 961          | Paired-end 50-25                         | 519,688,537        | 398,750,963 (76.73) | 519,688,537           | 269,057,017 (51.77) | 1,039,377,074         | 667,807,980   |
|                            | 961          | Paired-end 50-35                         | 559,495,443        | 411,013,028 (73.46) | 559,496,019           | 285,756,172 (51.07) | 1,118,991,462         | 696,769,200   |
|                            | A0011        | Mate-pair 50-50                          | 589,392,975        | 278,754,706 (47.30) | 589,414,032           | 451,927,364 (76.67) | 1,178,807,007         | 730,682,070   |
|                            | A0011        | Mate-pair 50-50                          | 617,629,481        | 392,309,644 (63.52) | 617,629,481           | 438,083,184 (70.93) | 1,235,258,962         | 830,392,828   |
|                            | <b>Total</b> |                                          |                    | 2,286,206,436       | 1,480,828,341 (65.25) | 2,286,228,069       | 1,444,823,737 (62.61) | 4,572,434,505 |
| <b>Biopsy, CD</b>          | 773          | Paired-end 50-25                         | 484,234,252        | 381,636,788 (78.81) | 452,073,774           | 141,160,435 (31.23) | 936,308,026           | 522,797,223   |
|                            | 960          | Paired-end 50-25                         | 514,575,922        | 378,298,973 (73.52) | 514,575,922           | 254,289,973 (49.42) | 1,029,151,844         | 632,588,946   |
|                            | 960          | Paired-end 50-35                         | 538,252,530        | 270,516,130 (50.26) | 538,252,530           | 202,613,709 (37.64) | 1,076,505,060         | 473,129,839   |
|                            | 5143         | Mate-pair 50-50                          | 585,483,136        | 261,711,344 (44.70) | 585,484,757           | 438,112,561 (74.83) | 1,170,967,893         | 699,823,905   |
|                            | 5143         | Mate-pair 50-50                          | 553,016,065        | 234,307,685 (42.37) | 553,016,311           | 367,414,882 (66.44) | 1,106,032,376         | 601,722,567   |
|                            | <b>Total</b> |                                          |                    | 2,675,561,905       | 1,526,470,920 (57.93) | 2,643,403,294       | 1,403,591,560 (51.91) | 5,318,965,199 |
| <b>Blood, healthy</b>      | 772          | Paired-end 50-25                         | 492,817,237        | 374,894,708 (76.07) | 486,480,725           | 186,502,155 (38.34) | 979,297,962           | 561,396,863   |
|                            | 963          | Paired-end 50-25                         | 457,943,882        | 305,183,001 (66.64) | 457,943,882           | 199,190,271 (43.50) | 915,887,764           | 504,373,272   |
|                            | 963          | Paired-end 50-35                         | 600,734,375        | 417,317,857 (69.47) | 600,735,043           | 304,154,032 (50.63) | 1,201,469,418         | 721,471,889   |
|                            | A0012        | Mate-pair 50-50                          | 618,376,260        | 354,407,446 (57.31) | 618,376,260           | 480,553,182 (77.71) | 1,236,752,520         | 834,960,628   |
|                            | A0012        | Mate-pair 50-50                          | 526,061,054        | 338,160,756 (64.28) | 526,082,029           | 397,872,348 (75.63) | 1,052,143,083         | 736,033,104   |
|                            | <b>Total</b> |                                          |                    | 2,695,932,808       | 1,789,963,768 (66.75) | 2,689,617,939       | 1,568,271,988 (57.16) | 5,385,550,747 |
| <b>Biopsy, healthy</b>     | 962          | Paired-end 50-25                         | 549,371,666        | 384,274,533 (69.95) | 549,371,811           | 265,723,189 (48.37) | 1,098,743,477         | 649,997,722   |
|                            | 962          | Paired-end 50-35                         | 565,612,315        | 402,419,332 (71.15) | 565,612,315           | 256,739,941 (45.39) | 1,131,224,630         | 659,159,273   |
|                            | 962          | Paired-end 50-35                         | 629,910,387        | 410,094,578 (65.10) | 629,910,387           | 107,353,553 (17.04) | 1,259,820,774         | 517,448,131   |
|                            | A1060        | Paired-end 50-35                         | 654,079,266        | 452,892,377 (69.24) | 654,079,266           | 286,751,243 (43.84) | 1,308,158,532         | 739,643,620   |
|                            | <b>Total</b> |                                          |                    | 2,398,973,634       | 1,649,680,820 (68.86) | 2,398,973,779       | 916,567,926 (38.66)   | 4,797,947,413 |

**Supplementary Table S2: Number of significantly called differences by pairwise comparison and tool. Somatic score  $\geq 100$  for SomaticSniper, p-values  $\leq 0.01$  for pibase and VarScan.**

| <b>Samples</b>     | <b>Comparison</b>          | <b>SomaticSniper</b> | <b>pibase</b> | <b>VarScan</b> |
|--------------------|----------------------------|----------------------|---------------|----------------|
| <b>TP1 genomes</b> | CD biopsy - CD blood       | 24                   | 285           | -              |
|                    | CD biopsy - healthy biopsy | 66                   | 626           | -              |
|                    | CD blood - healthy blood   | 75                   | 319           | -              |
| <b>TP1 exomes</b>  | CD biopsy - CD blood       | 30                   | 119           | 91             |
|                    | CD biopsy - healthy biopsy | 22                   | 129           | 164            |
|                    | CD blood - healthy blood   | 9                    | 120           | 63             |
| <b>TP2 exomes</b>  | CD blood - healthy blood   | 3                    | 19            | 26             |
| <b>TP3 exomes</b>  | CD blood - healthy blood   | 8                    | 18            | 70             |

**Supplementary Table S3: Genotypes of the three twins pairs at CD and IBD susceptibility loci.**

Locus type: Susceptibility locus for CD or IBD; Chromosomal positions according to human genome build hg18; GT: genotype.

| Locus type | Rs number  | ImmunoChip ID   | Chromosome    | Position  | Risk allele | Nonrisk allele | GT TP1 | GT TP2 | GT TP3 |    |
|------------|------------|-----------------|---------------|-----------|-------------|----------------|--------|--------|--------|----|
| <b>CD</b>  | rs17391694 | rs17391694      | 1             | 78396214  | C           | T              | CC     | -      | -      |    |
|            | rs6679677  | imm_1_114105331 | 1             | 114105331 | C           | A              | CC     | -      | -      |    |
|            | rs2641348  | vh_1_120239407  | 1             | 120239407 | A           | G              | AA     | AA     | AA     |    |
|            | rs7517810  | imm_1_171120083 | 1             | 171120083 | T           | C              | CC     | CC     | -      |    |
|            | rs1260326  | rs1260326       | 2             | 27584444  | T           | C              | TC     | CC     | TC     |    |
|            | rs10865331 | imm_2_62404976  | 2             | 62404976  | A           | G              | AA     | -      | -      |    |
|            | rs6716753  | imm_2_230805373 | 2             | 230805373 | C           | T              | TT     | -      | TT     |    |
|            | rs12994997 | imm_2_233838242 | 2             | 233838242 | A           | G              | AA     | AG     | GG     |    |
|            | rs7438704  | rs7438704       | 4             | 48058002  | G           | A              | GG     | -      | -      |    |
|            | rs13126505 | imm_4_103084327 | 4             | 103084327 | A           | G              | GG     | -      | -      |    |
|            | rs10065637 | imm_5_55474608  | 5             | 55474608  | C           | T              | CC     | -      | -      |    |
|            | rs10061469 | 1kg_5_72553904  | 5             | 72553904  | T           | C              | CC     | -      | -      |    |
|            | rs12663356 | rs12663356      | 6             | 21538707  | C           | T              | CC     | -      | -      |    |
|            | rs2503322  | rs2503322       | 6             | 127498953 | G           | A              | GG     | -      | -      |    |
|            | rs13204742 | imm_6_128287458 | 6             | 128287458 | T           | G              | GG     | GG     | -      |    |
|            | rs212388   | imm_6_159410424 | 6             | 159410424 | C           | T              | CT     | -      | CC     |    |
|            | rs10486483 | imm_7_26858965  | 7             | 26858965  | A           | G              | GG     | -      | -      |    |
|            | rs864745   | imm_7_28147081  | 7             | 28147081  | T           | C              | CT     | TT     | -      |    |
|            | rs7015630  | rs7015630       | 8             | 90945088  | T           | C              | CT     | -      | -      |    |
|            | rs6651252  | rs6651252       | 8             | 129636363 | T           | C              | TT     | -      | -      |    |
|            | rs3764147  | imm_13_43355925 | 13            | 43355925  | G           | A              | AA     | AG     | AA     |    |
|            | rs16967103 | imm_15_36686482 | 15            | 36686482  | C           | T              | TT     | -      | -      |    |
|            | rs2945412  | rs2945412       | 17            | 22867770  | A           | G              | AG     | -      | AA     |    |
|            | rs2024092  | 1kg_19_1075031  | 19            | 1075031   | A           | G              | GG     | GG     | GG     |    |
|            | rs4802307  | rs4802307       | 19            | 51541646  | G           | T              | GG     | GG     | GG     |    |
|            | rs516246   | imm_19_53897984 | 19            | 53897984  | T           | C              | CT     | CT     | TT     |    |
|            | rs2284553  | rs2284553       | 21            | 33698565  | G           | A              | AG     | -      | -      |    |
|            | <b>IBD</b> | rs12103         | rs12103       | 1         | 1237357     | A              | G      | GG     | GG     | AA |
|            |            | rs3766606       | imm_1_7944784 | 1         | 7944784     | G              | T      | GT     | GG     | -  |
|            |            | rs12568930      | rs12568930    | 1         | 22574818    | T              | C      | TT     | -      | -  |
| rs11209026 |            | imm_1_67478546  | 1             | 67478546  | G           | A              | GG     | GG     | GG     |    |
| rs2651244  |            | rs2651244       | 1             | 70768150  | G           | A              | AA     | -      | -      |    |
| rs4845604  |            | rs4845604       | 1             | 150068304 | G           | A              | GG     | -      | GG     |    |
| rs670523   |            | imm_1_154145356 | 1             | 154145356 | A           | G              | GG     | -      | -      |    |
| rs4656958  |            | imm_1_159123588 | 1             | 159123588 | G           | A              | AG     | AA     | GG     |    |
| rs2488389  |            | imm_1_195897764 | 1             | 195897764 | A           | G              | GG     | -      | -      |    |
| rs7554511  |            | imm_1_199144185 | 1             | 199144185 | C           | A              | CC     | -      | -      |    |
| rs3024505  |            | imm_1_205006527 | 1             | 205006527 | A           | G              | GG     | GG     | -      |    |
| rs13407913 |            | rs13407913      | 2             | 24951148  | G           | A              | AA     | -      | -      |    |
| rs925255   |            | rs925255        | 2             | 28468298  | C           | T              | CT     | -      | -      |    |
| rs10495903 |            | 1kg_2_43660422  | 2             | 43660422  | T           | C              | CC     | -      | -      |    |
| rs7608910  |            | imm_2_61058360  | 2             | 61058360  | G           | A              | AG     | -      | AA     |    |
| rs6740462  |            | imm_2_65520776  | 2             | 65520776  | A           | C              | AA     | -      | -      |    |
| rs6708413  |            | imm_2_102429801 | 2             | 102429801 | G           | A              | AG     | AG     | AG     |    |
| rs2111485  |            | imm_2_162818782 | 2             | 162818782 | A           | G              | AG     | -      | -      |    |
| rs1517352  |            | imm_2_191639709 | 2             | 191639709 | C           | A              | AC     | -      | -      |    |
| rs2382817  |            | seq-rs2382817   | 2             | 218859462 | A           | C              | AC     | -      | -      |    |
| rs3749171  |            | 1kg_2_241218365 | 2             | 241218365 | T           | C              | CC     | CT     | CT     |    |
| rs4256159  |            | 1kg_3_18742408  | 3             | 18742408  | T           | C              | CC     | TT     | -      |    |
| rs3197999  |            | imm_3_49696536  | 3             | 49696536  | A           | G              | GG     | AA     | AG     |    |
| rs2457996  |            | rs2457996       | 4             | 75075399  | T           | C              | CT     | CC     | -      |    |
| rs7657746  |            | imm_4_123381069 | 4             | 123381069 | A           | G              | AA     | -      | AA     |    |
| rs2930047  |            | rs2930047       | 5             | 10748526  | C           | T              | CT     | -      | -      |    |
| rs11742570 |            | imm_5_40446341  | 5             | 40446341  | C           | T              | CT     | TT     | -      |    |
| rs1363907  |            | imm_5_96278559  | 5             | 96278559  | A           | G              | GG     | -      | -      |    |
| rs10051722 |            | rs10051722      | 5             | 130131975 | A           | C              | AC     | -      | -      |    |
| rs6863411  |            | imm_5_141493388 | 5             | 141493388 | T           | A              | AT     | -      | -      |    |
| rs11741861 |            | imm_5_150258102 | 5             | 150258102 | G           | A              | AA     | AA     | AG     |    |
| rs6871626  |            | imm_5_158759370 | 5             | 158759370 | A           | C              | AA     | -      | -      |    |
| rs4976646  |            | rs4976646       | 5             | 176721176 | A           | G              | AA     | -      | -      |    |
| rs17119    |            | rs17119         | 6             | 14827475  | A           | G              | AA     | -      | -      |    |
| rs9358372  |            | imm_6_20920567  | 6             | 20920567  | G           | A              | GG     | -      | GG     |    |
| rs1847472  |            | imm_6_91029880  | 6             | 91029880  | C           | A              | AC     | -      | CC     |    |
| rs7746082  |            | imm_6_106541962 | 6             | 106541962 | C           | G              | GG     | -      | -      |    |
| rs3851228  |            | rs3851228       | 6             | 111954884 | T           | A              | AA     | -      | -      |    |
| rs6920220  |            | imm_6_138048197 | 6             | 138048197 | A           | G              | AG     | -      | -      |    |

|            |                     |    |           |   |   |    |    |    |
|------------|---------------------|----|-----------|---|---|----|----|----|
| rs12199775 | rs12199775          | 6  | 143940587 | A | G | AA | -  | -  |
| rs1819333  | imm_6_167293537     | 6  | 167293537 | T | G | TT | -  | -  |
| rs1456896  | imm_7_50275007      | 7  | 50275007  | T | C | CT | CT | TT |
| rs9297145  | rs9297145           | 7  | 98597053  | C | A | AA | -  | -  |
| rs38911    | rs38911             | 7  | 116682399 | G | A | AA | GG | -  |
| rs921720   | ccc-8-126603853-A-G | 8  | 126603853 | G | A | GG | -  | -  |
| rs13277237 | rs13277237          | 8  | 130673745 | G | A | AA | -  | -  |
| rs10758669 | imm_9_4971602       | 9  | 4971602   | C | A | CC | -  | -  |
| rs4743820  | rs4743820           | 9  | 92968237  | T | C | CC | -  | -  |
| rs4246905  | imm_9_116593070     | 9  | 116593070 | C | T | CC | CT | CT |
| rs10781499 | imm_9_138386226     | 9  | 138386226 | A | G | AG | GG | AG |
| rs12722515 | imm_10_6121236      | 10 | 6121236   | C | A | CC | -  | CC |
| rs1042058  | 1kg_10_30768107     | 10 | 30768107  | C | T | CT | CC | TT |
| rs11010067 | imm_10_35335437     | 10 | 35335437  | G | C | CG | -  | -  |
| rs2790216  | 1kg_10_59667932     | 10 | 59667932  | G | A | AG | -  | -  |
| rs10761659 | imm_10_64115570     | 10 | 64115570  | G | A | AA | AA | -  |
| rs2227551  | rs2227551           | 10 | 75339196  | T | G | GT | GG | -  |
| rs1250546  | imm_10_80702538     | 10 | 80702538  | A | G | AA | AA | -  |
| rs7097656  | rs7097656           | 10 | 82240811  | C | T | CT | -  | -  |
| rs12778642 | rs12778642          | 10 | 94454287  | T | G | GT | -  | -  |
| rs4409764  | imm_10_101274227    | 10 | 101274227 | T | G | TT | -  | -  |
| rs907611   | rs907611            | 11 | 1830648   | A | G | AG | -  | -  |
| rs11229555 | rs11229555          | 11 | 58165263  | G | T | GT | -  | -  |
| rs11230563 | imm_11_60532785     | 11 | 60532785  | C | T | CC | CC | TT |
| rs174537   | rs174537            | 11 | 61309256  | T | G | TT | -  | -  |
| rs559928   | rs559928            | 11 | 63906946  | C | T | CC | CC | TT |
| rs568617   | rs568617            | 11 | 65409818  | T | C | CC | CC | CC |
| rs2155219  | imm_11_75976842     | 11 | 75976842  | T | G | GT | -  | -  |
| rs2226628  | rs2226628           | 11 | 86769493  | A | G | AA | -  | -  |
| rs566416   | imm_11_118264820    | 11 | 118264820 | T | G | TT | -  | -  |
| rs11054935 | rs11054935          | 12 | 12540110  | G | A | AG | -  | -  |
| rs11564258 | imm_12_39078567     | 12 | 39078567  | A | G | AG | -  | -  |
| rs11168249 | rs11168249          | 12 | 46494635  | C | T | TT | -  | -  |
| rs7134599  | imm_12_66786342     | 12 | 66786342  | A | G | GG | -  | -  |
| rs17085007 | rs17085007          | 13 | 26429267  | C | T | CT | TT | -  |
| rs941823   | rs941823            | 13 | 39911977  | C | T | CT | -  | TT |
| rs3742130  | rs3742130           | 13 | 98705342  | G | A | GG | GG | GG |
| rs194749   | imm_14_68343658     | 14 | 68343658  | C | T | CT | -  | -  |
| rs1569328  | rs1569328           | 14 | 74811504  | C | T | CC | -  | -  |
| rs8005161  | 1kg_14_87542348     | 14 | 87542348  | T | C | CC | -  | -  |
| rs17293632 | imm_15_65229650     | 15 | 65229650  | T | C | TT | TT | CC |
| rs529866   | rs529866            | 16 | 11280821  | C | T | CC | -  | -  |
| rs7404095  | rs7404095           | 16 | 23772091  | C | T | CT | TT | -  |
| rs26528    | imm_16_28425210     | 16 | 28425210  | C | T | CT | -  | CC |
| rs2361755  | imm_16_84567187     | 16 | 84567187  | G | C | GG | -  | -  |
| rs3091315  | 1kg_17_29617778     | 17 | 29617778  | A | G | AA | -  | -  |
| rs12946510 | imm_17_35165903     | 17 | 35165903  | T | C | CT | CC | -  |
| rs12942547 | imm_17_37781070     | 17 | 37781070  | A | G | AG | AA | AA |
| rs1292053  | rs1292053           | 17 | 55318319  | G | A | AG | AG | AG |
| rs1893217  | imm_18_12799340     | 18 | 12799340  | G | A | AA | -  | -  |
| rs7240004  | rs7240004           | 18 | 44649020  | A | G | AG | AA | -  |
| rs727088   | imm_18_65681419     | 18 | 65681419  | G | A | AG | -  | -  |
| rs11879191 | imm_19_10373911     | 19 | 10373911  | G | A | AG | -  | GG |
| rs17694108 | rs17694108          | 19 | 38423391  | A | G | AG | -  | -  |
| rs1654644  | seq-rs1654644       | 19 | 60065174  | G | T | GT | -  | TT |
| rs4243971  | rs4243971           | 20 | 30313178  | G | T | GT | -  | -  |
| rs6087990  | rs6087990           | 20 | 30813569  | C | T | TT | CC | -  |
| rs6074022  | imm_20_44173603     | 20 | 44173603  | C | T | TT | -  | TT |
| rs913678   | rs913678            | 20 | 48388831  | T | C | CT | -  | -  |
| rs259964   | rs259964            | 20 | 57257704  | A | G | AA | AA | GG |
| rs6062504  | rs6062504           | 20 | 61819351  | G | A | GG | -  | -  |
| rs2823286  | imm_21_15739809     | 21 | 15739809  | G | A | GG | -  | -  |
| rs2836878  | imm_21_39387404     | 21 | 39387404  | G | A | GG | -  | -  |
| rs7282490  | imm_21_44440169     | 21 | 44440169  | G | A | AG | -  | -  |
| rs2266959  | imm_22_20252904     | 22 | 20252904  | T | G | GT | -  | -  |
| rs5763767  | imm_22_28823882     | 22 | 28823882  | A | G | GG | AA | -  |
| rs2413583  | imm_22_37989719     | 22 | 37989719  | C | T | CT | -  | -  |
